# Supplementary material for: Local projections of layer Vb-to-Va are more prominent in lateral than in medial entorhinal cortex
Source: eLife. 2021 Mar 26;10:e67262. doi: 10.7554/eLife.67262 (PMC8051944; doi:10.7554/eLife.67262)
Supplement: Figure 1—figure supplement 2—source data 1. [file elife-67262-fig1-figsupp2-data1.xlsx]

## Sheet: Figure 1—figure supplement 2
Figure 1—figure supplement 2
LEC
Animal ID	Genotype	GFP-labeled neuron (n)	Double-labeled (Ctip2+GFP) neuron (n)	Percentage of Double- /GFP-labeled neurons
59056	GAD1GFP	75	14	0.186667
60144	GAD1GFP	76	12	0.157895
60145	GAD1GFP	69	14	0.202899
60527	GAD1GFP	68	12	0.176471
			Mean	0.180983
			SEM	0.00816251
Animal ID	Genotype	GFP-labeled neuron (n)	Double-labeled (PCP4+GFP) neuron (n)	Percentage of Double- /GFP-labeled neurons
59056	GAD1GFP	75	2	0.0266667
60144	GAD1GFP	56	2	0.0357143
60145	GAD1GFP	53	3	0.0566038
60527	GAD1GFP	78	4	0.0512821
			Mean	0.0425667
			SEM	0.00598312
MEC
Animal ID	Genotype	GFP-labeled neuron (n)	Double-labeled (Ctip2+GFP) neuron (n)	Percentage of Double- /GFP-labeled neurons
59056	GAD1GFP	146	10	0.0684932
60144	GAD1GFP	118	9	0.0762712
60145	GAD1GFP	140	11	0.0785714
60527	GAD1GFP	138	9	0.0652174
			Mean	0.0721383
			SEM	0.00273464
Animal ID	Genotype	GFP-labeled neuron (n)	Double-labeled (PCP4+GFP) neuron (n)	Percentage of Double- /GFP-labeled neurons
59056	GAD1GFP	146	3	0.0205479
60144	GAD1GFP	114	3	0.0263158
60145	GAD1GFP	97	2	0.0206186
60527	GAD1GFP	122	3	0.0245902
			Mean	0.0230181
			SEM	0.00125513
