# Supplementary material for: Local projections of layer Vb-to-Va are more prominent in lateral than in medial entorhinal cortex
Source: eLife. 2021 Mar 26;10:e67262. doi: 10.7554/eLife.67262 (PMC8051944; doi:10.7554/eLife.67262)
Supplement: Figure 1—source data 1. [file elife-67262-fig1-data1.xlsx]

## Sheet: Figure 1
Figure 1
Figure 1D	LEC
	Animal ID	Genotype	Virus	Injection site	layer II	layer III	layer Va	layer Vb	layer VI
	71958	MEC13-53D+/-; tetOGCaMP6-mCherry	-	-	0	0	0.0228571	0.965714	0.0114286
	71957	MEC13-53D+/-; tetOGCaMP6-mCherry	-	-	0	0	0.0220994	0.917127	0.0607735
	85955	MEC13-53D+/-	AAV-TRE-tight-GFP	right EC	0	0	0	0.869565	0.130435
	85955	MEC13-53D+/-	AAV-TRE-tight-GFP	left EC	0	0	0.0238095	0.97619	0
				Mean	0	0	0.0171915	0.932149	0.0506592
	MEC
	Animal ID	Genotype	Virus	Injection site	layer II	layer III	layer Va	layer Vb	layer VI
	71958	MEC13-53D+/-; tetOGCaMP6-mCherry	-	-	0	0.00446429	0.00892857	0.973214	0.0133929
	71957	MEC13-53D+/-; tetOGCaMP6-mCherry	-	-	0	0	0.003663	0.959707	0.03663
	84439	MEC13-53D+/-	AAV-TRE-tight-GFP	MEC	0	0	0.00974659	0.847953	0.1423
	84859	MEC13-53D+/-	AAV-TRE-tight-GFP	right EC	0	0	0	0.75817	0.24183
	84859	MEC13-53D+/-	AAV-TRE-tight-GFP	left EC	0	0	0	0.75	0.25
				Mean	0	0	0.0033524	0.828958	0.16769
Figure 1EF	LEC
	Animal ID	Genotype	Virus	Injection site	PCP4-labeled neuron (n)	tTA-expressing neuron (n)	Double labeled neuron (n)	Percentage of Double- /PCP4-labeled neurons	Percentage of Double- /tTA-expressing neurons
	71958	MEC13-53D+/-; tetOGCaMP6-mCherry	-	-	291	176	171	0.587629	0.971591
	71957	MEC13-53D+/-; tetOGCaMP6-mCherry	-	-	342	166	157	0.459064	0.945783
	85955	MEC13-53D+/-	AAV-TRE-tight-GFP	right EC	185	80	66	0.356757	0.825
	85955	MEC13-53D+/-	AAV-TRE-tight-GFP	left EC	88	41	38	0.431818	0.926829
							Mean	0.458817	0.917301
							SEM	0.0416367	0.0278039
	MEC
	Animal ID	Genotype	Virus	Injection site	PCP4-labeled neuron (n)	tTA-expressing neuron (n)	Double labeled neuron (n)	Percentage of Double- /PCP4-labeled neurons	Percentage of Double- /tTA-expressing neurons
	71958	MEC13-53D+/-; tetOGCaMP6-mCherry	-	-	733	223	222	0.302865	0.995516
	71957	MEC13-53D+/-; tetOGCaMP6-mCherry	-	-	799	262	254	0.317897	0.969466
	84439	MEC13-53D+/-	AAV-TRE-tight-GFP	MEC	973	405	404	0.415211	0.997531
	84859	MEC13-53D+/-	AAV-TRE-tight-GFP	right EC	525	116	116	0.220952	1
	84859	MEC13-53D+/-	AAV-TRE-tight-GFP	left EC	126	36	36	0.285714	1
							Mean	0.308528	0.992502
							SEM	0.0280649	0.00520571
