# Supplementary material for: Local projections of layer Vb-to-Va are more prominent in lateral than in medial entorhinal cortex
Source: eLife. 2021 Mar 26;10:e67262. doi: 10.7554/eLife.67262 (PMC8051944; doi:10.7554/eLife.67262)
Supplement: Figure 2—source data 1. [file elife-67262-fig2-data1.xlsx]

## Sheet: Figure 2
Figure 2
LEC LVa neurons
Animal ID (slice No.)	Vrest (mV)	Rin (MΩ)	Time constant (msec)	Sag ratio (Steady state/Peak)	APthre (mV)	APpeak (mV)	APHW (ms)	APrise (mV/ms)	Fast AHP (mV)	Medium AHP (mV)	AP frequency after 200 pA inj. (Hz)	Adaption (1-Flast/Ffirst)
85347 (3)	-65	174.341	36.981	0.76243	-37.82	92.9721	1.04709	482.385	-9.0733	-24.4959	10	0.419151
85347 (4)	-64	318.317	39.0992	0.736857	-34.1	80.1487	1.05414	289.369	-6.349	-21.49	16	0.447821
85350 (1)	-59	319.723	80.1002	0.784228	-34.5	78.9773	1.74426	268.613	-2.325	-19.0039	10	0.570443
85350 (1)	-59	331.14	58.5204	0.767969	-33.14	80.8969	1.22584	302.345	-7.6517	-18.8335	14	0.270953
85350 (1)	-60	461.168	57.0305	0.760521	-29.72	66.3838	1.37735	213.038	-11.6675	-20.8022	16	0.413729
85350 (1)	-61	217.763	29.7983	0.87618	-35.24	86.62	0.886862	439.775	-10.6428	-13.329	16	0.015513
86513 (2)	-69	123.804	39.8282	0.953948	-42.63	97.4145	0.959022	616.249	-9.6246	-18.9011	9	0.453595
86513 (2)	-62	428.835	42.891	0.615418	-34.38	84.1827	1.03904	310.328	-10.5425	-24.745	17	0.420228
86513 (3)	-62	266.665	52.3118	0.756502	-35.5	84.55	1.25268	343.757	-1.1236	-20.3565	11	0.4259
86513 (3)	-61	341.845	52.5407	0.758109	-33.78	79.1382	1.2029	329.708	-7.7306	-23.1837	15	0.146407
86513 (3)	-60	327.153	41.0495	0.664048	-31.27	86.4534	1.08922	427.639	-11.5253	-23.2251	14	0.477253
86808 (1)	-59	327.933	57.7622	0.831242	-36.09	85.8771	0.999274	338.889	-13.3223	-24.2542	15	0.513943
86808 (1)	-64	446.325	52.0987	0.794352	-34.59	89.3041	1.02678	383.843	-12.4598	-22.7519	20	0.360292
86808 (2)	-65	472.712	58.0038	0.732968	-29.92	69.5248	1.15461	266.427	-12.1835	-24.9895	17	0.364578
82722 (2)	-67	425.4	59.9915	0.767178	-33.96	83.9043	1.22255	376.852	-7.8577	-20.0968	14	0.573083
82990 (1)	-64	244.556	53.3838	0.716615	-33.3	99.6159	1.02849	398.394	-12.0346	-22.8375	15	0.413369
83384 (1)	-64	274.648	46.653	0.749696	-38.88	97.8275	1.15616	419.626	-9.4519	-16.1335	23	0.407779
83384 (1)	-59	238.75	57.5916	0.780599	-31.08	81.0053	1.33127	285.913	-3.0482	-21.9422	8	0.531109
83384 (2)	-58	326.215	61.7432	0.77165	-33.6	88.0202	1.29098	379.66	-9.3617	-22.6311	10	0.681448
83384 (2)	-67	123.293	26.0687	0.939519	-40.76	105.415	1.1324	463.514	-6.1223	-15.6487	10	0.46993
83384 (2)	-72	125.051	18.117	0.932174	-38.96	104.185	1.04372	478.632	-7.3702	-18.5696	13	0.521619
83384 (2)	-71	381.21	51.6613	0.865994	-35.2	89.3796	0.963214	467.345	-14.4125	-20.6688	21	0.288083
83389 (1)	-63	465.67	71.5468	0.682159	-30.6	77.9602	1.57756	266.831	-5.3738	-28.1154	14	0.423939
83389 (2)	-60	208.898	44.696	0.658372	-33.72	95.415	1.2267	368.422	-8.1489	-20.8564	10	0.562152
83836 (2)	-64	193.948	33.5602	0.701682	-34.92	90.6516	1.08506	400.58	-7.7607	-18.7821	12	0.419852
83836 (2)	-65	222.175	48.9859	0.789594	-33.87	89.5199	1.13608	477.044	-9.9241	-23.907	12	0.415776
85178 (1)	-59	219.519	48.0902	0.592778	-35.08	82.3191	1.54105	287.244	-2.5115	-20.5267	10	0.386123
85178 (3)	-59	369.506	64.7797	0.753213	-35.64	82.3172	1.40959	293.175	-4.5742	-16.2825	14	0.482891
85178 (3)	-64	218.262	55.601	0.771099	-35.02	86.6499	1.38231	357.629	-9.0825	-22.7942	10	0.434052
85178 (3)	-65	166.79	44.0381	0.713201	-34.65	87.7374	1.3421	339.735	-5.4862	-22.3478	8	0.385961
85178 (4)	-66	364.459	51.6335	0.754016	-36.35	86.6194	1.3439	306.872	-6.6621	-21.1455	16	0.421915
Mean	-63.129	294.389	49.5535	0.765623	-34.7829	86.806	1.20233	367.091	-8.23886	-21.0854	13.5484	0.42319
SEM	0.646357	18.7474	2.29425	0.0149633	0.510307	1.54186	0.0350358	15.3454	0.595789	0.554583	0.663981	0.0219963
N (neurons)	31	31	31	31	31	31	31	31	31	31	31	31
LEC LVb neurons
Animal ID (slice No.)	Vrest (mV)	Rin (MΩ)	Time constant (msec)	Sag ratio (Steady state/Peak)	APthre (mV)	APpeak (mV)	APHW (ms)	APrise (mV/ms)	Fast AHP (mV)	Medium AHP (mV)	AP frequency after 200 pA inj. (Hz)	Adaption (1-Flast/Ffirst)
83587 (1)	-74	523.637	35.7168	0.85552	-44.59	93.9547	1.32078	436.4	-6.9019	-23.3568	17	0.327781
83587 (1)	-60	310.885	30.2738	0.876338	-41.66	90.6469	1.37871	381.948	-8.9535	-17.1493	20	0.275561
83587 (1)	-68	227.892	28.9285	0.876609	-38.08	95.4219	1.54144	419.819	-4.4963	-15.9772	16	0.315287
83587 (2)	-64	183.577	30.1609	0.927539	-33.58	92.7148	1.3931	429.928	-7.1025	-12.5352	14	0.179771
83587 (2)	-61	211.973	28.5049	0.829074	-41.53	100.089	1.32735	411.977	-6.4559	-12.3055	21	-0.0839767
83587 (3)	-68	341.733	38.4916	0.852533	-33.67	85.1554	1.60114	310.348	-6.2944	-13.0384	19	0.506213
83587 (3)	-66	229.226	26.8043	0.874268	-37.1	90.7289	1.41461	339.515	-8.533	-16.9662	17	0.267193
84440 (3)	-63	328.01	36.2741	0.904169	-36.43	91.4122	1.38342	379.974	-8.8109	-15.9296	19	0.195015
84440 (3)	-61	305.588	29.9557	0.881489	-38.4	90.7483	1.38011	409.166	-9.9503	-17.8838	21	0.361428
84440 (3)	-58	498.853	43.77	0.783166	-27.88	69.8114	1.46116	234.479	-10.8043	-27.5394	15	0.494545
84440 (3)	-66	230.288	16.0279	0.916497	-37.46	93.4254	1.38545	406.68	-9.8087	-18.787	24	-0.1701
84440 (3)	-61	216.322	30.0323	0.898785	-38.51	90.4061	1.32807	436.065	-8.7251	-12.9794	22	0.258344
84441 (1)	-72	236.268	31.2156	0.928073	-35.88	93.4537	1.59804	326.897	-7.831	-15.3868	16	0.336924
84441 (1)	-64	284.155	27.8385	0.894796	-38.24	86.6528	1.69975	290.165	-7.6116	-16.5133	19	0.0974893
84441 (2)	-65	143.277	17.2222	0.897324	-36.53	88.2964	1.5426	289.43	-4.0276	-11.8331	15	0.189566
84441 (2)	-60	152.377	19.1898	0.930214	-38.32	88.2791	1.45517	370.704	-6.2271	-14.6423	19	0.17642
84441 (2)	-62	340.875	43.95	0.737972	-31.38	82.5844	1.27847	311.91	-4.2445	-18.1071	14	0.701381
84441 (2)	-63	168.75	19.1492	0.908691	-34.86	86.9896	1.45265	359.504	-7.4622	-13.3654	14	0.491587
84441 (2)	-62	272.572	29.51	0.904635	-34.55	91.3914	1.426	343.488	-9.8094	-15.2214	17	0.348689
84441 (2)	-69	221.322	31.6055	0.89976	-35.1	96.7559	1.35319	475.791	-8.0998	-19.3299	16	0.204887
84441 (3)	-57	204.094	28.402	0.889312	-40.36	88.0232	1.38038	312.34	-5.0231	-10.083	17	0.385354
84441 (3)	-67	258.215	24.2813	0.913223	-40.16	102.163	1.28315	488.016	-10.675	-14.8982	22	-0.040327
84441 (3)	-64	301.875	28.2535	0.881708	-39.24	91.8181	1.18743	338.761	-6.4693	-13.2757	21	0.888567
84441 (3)	-61	273.042	31.9724	0.845066	-39.88	97.3783	1.30048	453.918	-4.9487	-16.2731	23	0.239436
85347 (1)	-61	247.591	20.4018	0.858262	-37.22	88.4244	1.13554	457.718	-11.3929	-16.1075	21	-0.315398
85347 (2)	-64	287.692	30.5298	0.858963	-36.88	95.0691	1.09426	426.344	-7.3474	-16.9988	17	0.358215
85347 (2)	-62	235.284	19.188	0.876206	-28.2	84.1341	1.09745	417.315	-17.0979	-23.5109	19	0.346499
85350 (1)	-66	347.295	36.6689	0.874269	-32.22	90.3127	1.62889	330.037	-4.8504	-13.2343	16	0.251942
85350 (1)	-65	231.355	24.8713	0.94755	-36.96	92.6916	1.59089	457.406	-6.1266	-14.338	17	0.171589
85350 (1)	-66	199.712	22.1393	0.928475	-38.18	94.9714	1.43667	380.714	-11.0157	-15.0512	20	0.0119219
85350 (1)	-67	182.865	18.0984	0.920693	-34.82	91.3457	1.59721	370.374	-3.9691	-11.5705	16	0.399993
85350 (2)	-64	358.347	28.3966	0.797155	-29.38	85.718	1.42336	436.69	-10.504	-20.6705	22	0.291262
85350 (2)	-66	187.15	22.0078	0.892474	-40.24	98.4694	1.32762	547.012	-5.8439	-14.0554	20	0.246363
85350 (2)	-63	202.239	24.4123	0.8681	-36.54	88.2822	1.45453	361.633	-7.225	-14.514	20	-0.105689
85350 (3)	-65	280.898	30.7005	0.896327	-33.69	86.5179	1.18838	424.309	-10.1772	-17.1709	19	0.203255
85350 (3)	-62	340.598	29.8319	0.864506	-32.16	86.715	1.14622	401.029	-11.4152	-18.0781	23	0.0010067
86513 (2)	-68	295.257	36.2217	0.93163	-37.1	93.3311	1.32074	404.326	-8.9839	-17.1954	18	0.0109547
86513 (2)	-69	239.051	21.9682	0.897369	-36.68	94.5659	1.29697	387.154	-10.3406	-19.6136	21	0.165015
86513 (3)	-70	304.928	27.4476	0.943722	-33	90.5267	1.32581	444.823	-6.9465	-15.3613	18	0.104929
86808 (1)	-63	270.28	24.8963	0.946573	-34.8	99.7668	1.02894	451.331	-9.0839	-15.7679	23	-0.00338141
86808 (1)	-68	258.785	28.1573	0.935872	-31.98	88.7588	1.1934	339.108	-6.2792	-18.2919	19	0.337087
86808 (1)	-68	346.577	26.2781	0.886733	-34.98	90.0981	1.09978	477.357	-9.8152	-15.7586	23	0.453978
86808 (2)	-66	326.685	25.6193	0.870404	-36.41	88.3949	1.19012	463.336	-11.0165	-17.979	23	0.282794
86808 (2)	-70	188.173	25.9414	0.965841	-37.33	95.1098	1.14102	534.315	-9.8449	-14.6312	19	0.145931
86808 (2)	-69	309.575	33.1643	0.902004	-33.35	94.4741	1.25428	399.152	-6.096	-17.1071	17	0.174467
Mean	-64.8444	269.003	28.0994	0.88822	-36.1224	91.0217	1.35211	397.082	-8.10307	-16.2307	18.8667	0.232884
SEM	0.537902	11.5019	0.943904	0.00645594	0.514428	0.799426	0.0238152	9.68392	0.380636	0.485735	0.408067	0.0321348
N (neurons)	45	45	45	45	45	45	45	45	45	45	45	45
MEC LVa neurons
Animal ID (slice No.)	Vrest (mV)	Rin (MΩ)	Time constant (msec)	Sag ratio (Steady state/Peak)	APthre (mV)	APpeak (mV)	APHW (ms)	APrise (mV/ms)	Fast AHP (mV)	Medium AHP (mV)	AP frequency after 200 pA inj. (Hz)	Adaption (1-Flast/Ffirst)
85349 (2)	-63	221.789	31.3817	0.845822	-34.55	72.4025	1.45006	203.966	-5.9616	-17.4425	11	0.565914
85349 (3)	-60	417.257	52.3619	0.808354	-32.12	80.9842	1.24885	290.62	-6.8274	-21.8746	13	0.647876
81760 (2)	-60	527.142	63.3919	0.76842	-31.41	80.8347	1.22009	324.192	-8.3046	-17.2654	15	0.666792
81760 (2)	-64	335.45	32.7931	0.822365	-41.05	87.2452	1.07779	420.098	-10.2051	-14.0156	19	0.483489
81760 (3)	-59	258.85	45.6515	0.663142	-38.03	90.8358	1.40931	423.887	-2.7319	-18.9678	14	0.553226
82296 (3)	-67	390.018	66.9504	0.795839	-32	80.1134	2.01245	276.941	-4.0616	-18.3614	13	0.65032
82296 (3)	-59	613.102	68.6247	0.790862	-35.58	88.696	1.44164	306.871	-10.9356	-16.1284	16	0.531843
82770 (4)	-65	230.874	36.8008	0.801021	-33.5	81.7987	1.07076	284.975	-9.0742	-18.2397	14	0.653872
83380 (1)	-71	215.819	24.9395	0.803821	-37.44	82.3375	1.13852	347.503	-6.1774	-13.6083	14	0.691306
83380 (2)	-70	482.84	54.2839	0.748825	-32.94	76.089	1.3256	244.469	-8.7104	-23.6658	13	0.626931
83380 (2)	-70	426.398	45.4926	0.687363	-32.63	82.6982	1.14921	388.864	-9.4735	-18.7813	16	0.413273
83380 (2)	-60	348.842	67.72	0.740693	-32.22	86.8376	1.50073	402.593	-3.5348	-18.331	13	0.599383
83381 (2)	-71	179.066	44.0203	0.773329	-32.13	80.8041	1.45358	265.268	-5.8771	-16.0436	10	0.769793
83835 (2)	-61	297.072	34.2071	0.856802	-33.36	90.8583	1.30238	407.305	-4.6489	-32.616	18	0.645075
83835 (2)	-58	450.138	30.6912	0.693204	-33.94	87.3063	1.09198	303.431	-7.9147	-11.5434	30	0.627033
84627 (2)	-68	210.163	30.3674	0.797898	-38.17	90.2798	1.0094	388.091	-6.7899	-20.2155	13	0.62772
84627 (2)	-71	306.113	33.9576	0.751935	-38.12	89.8935	0.98141	396.67	-8.1164	-21.0989	19	0.581447
85866 (2)	-65	409.108	34.084	0.645582	-32.54	79.7479	1.14847	320.34	-10.328	-24.2531	15	0.635803
85866 (2)	-65	261.442	38.4324	0.747009	-28.64	77.8459	1.20675	362.865	-6.8958	-24.8201	10	0.594751
85868 (1)	-64	185.757	26.1764	0.748491	-35.2	87.7669	0.905014	476.32	-4.967	-19.9281	13	0.782224
Mean	-64.55	338.362	43.1164	0.764539	-34.2785	83.7688	1.2572	341.763	-7.0768	-19.36	14.95	0.617404
SEM	0.981007	26.7627	3.13986	0.0125649	0.65242	1.16125	0.0540058	15.382	0.513493	1.01792	0.949934	0.0186312
N (neurons)	20	20	20	20	20	20	20	20	20	20	20	20
MEC LVb neurons
Animal ID (slice No.)	Vrest (mV)	Rin (MΩ)	Time constant (msec)	Sag ratio (Steady state/Peak)	APthre (mV)	APpeak (mV)	APHW (ms)	APrise (mV/ms)	Fast AHP (mV)	Medium AHP (mV)	AP frequency after 200 pA inj. (Hz)	Adaption (1-Flast/Ffirst)
83582 (1)	-60	291.495	12.7738	0.845863	-30.35	89.913	1.40397	330.975	-9.1918	-14.1658	17	0.362612
83582 (1)	-61	318.595	27.3535	0.925474	-30.55	101.935	1.31647	398.527	-5.2674	-11.6801	21	0.323843
83582 (2)	-68	427.482	19.2248	0.804187	-38.66	88.7417	1.19889	289.041	-12.5166	-13.8304	24	-0.0154611
83582 (2)	-65	150.507	6.73561	0.892044	-32.96	81.1983	1.12613	287.244	-10.8759	-10.8759	20	0.600186
83582 (2)	-64	167.054	5.87683	0.853568	-34.77	89.0548	1.14677	421.972	-9.5824	-12.9556	23	0.38001
83582 (2)	-63	151.974	6.66417	0.828272	-32.78	82.5827	1.25538	299.379	-10.985	-13.2374	17	0.79379
83582 (4)	-57	625.305	23.034	0.838285	-33.88	86.9265	1.23602	353.435	-10.8302	-14.6393	24	0.322443
83582 (4)	-65	598.455	18.1831	0.872622	-33.23	83.3607	1.13675	396.986	-14.7143	-15.5888	24	0.308789
83582 (4)	-62	462.865	23.575	0.8746	-32.86	94.5502	1.2677	527.12	-10.5296	-20.8843	25	-0.133531
83582 (4)	-65	512.17	27.9062	0.867768	-33.44	89.0586	1.32173	310.313	-9.5095	-18.3935	17	0.199545
84631 (2)	-67	221.8	12.6735	0.856394	-39.16	93.3617	1.13462	497.682	-8.5787	-12.9498	25	0.433697
84631 (2)	-69	244.445	9.86938	0.851622	-33.82	84.8252	1.10092	335.454	-11.0009	-15.686	27	0.58306
84631 (3)	-70	219.404	6.89544	0.878941	-39.7	92.1617	1.11657	416.066	-10.8535	-15.0454	29	0.126631
84631 (3)	-60	214.041	14.9997	0.827385	-39.08	94.2808	1.21884	410.572	-7.3162	-9.0958	24	-0.00861568
84631 (3)	-67	364.588	15.2031	0.828222	-35.82	89.752	1.2158	331.601	-10.8856	-12.8252	27	0.389559
84631 (4)	-66	512.245	20.4702	0.870091	-34.23	86.9643	1.0954	367.485	-14.6015	-19.5658	27	-0.0556728
84635 (1)	-65	494.365	25.7892	0.761755	-33	92.2189	1.23757	442.655	-11.422	-11.422	18	0.498233
84635 (2)	-68	542.082	26.3719	0.798605	-35.08	87.4084	1.22351	364.675	-14.0325	-18.6846	26	0.527147
84635 (2)	-67	472.918	28.8812	0.867213	-35.06	84.9096	1.24514	297.349	-10.7916	-14.7896	27	0.406512
85345 (1)	-66	391.692	16.0958	0.799914	-42	93.8673	1.06328	371.955	-8.5847	-8.5847	26	0.366267
85345 (1)	-66	247.957	19.0831	0.95176	-35.05	92.4203	1.3774	512.079	-11.9974	-14.6564	23	0.304674
85345 (2)	-65	299.502	27.6617	0.847303	-33.58	80.3686	1.0759	308.281	-11.8968	-16.4257	24	0.583248
85345 (3)	-68	307.075	23.083	0.848453	-35.72	87.4909	1.05058	416.045	-8.8249	-9.8259	29	-0.0794521
85349 (2)	-67	287.877	13.638	0.851731	-26.93	77.6036	0.880423	363.426	-13.5339	-18.2797	29	0.1032
85349 (3)	-65	297.527	29.6436	0.853474	-36.93	95.4314	1.34354	500.369	-8.2344	-9.76769	21	0.307454
Mean	-65.04	352.937	18.4674	0.851822	-34.7456	88.8154	1.19157	382.027	-10.6623	-14.1542	23.76	0.305127
SEM	0.607895	27.8537	1.51591	0.00773931	0.641053	1.07956	0.0232095	14.1734	0.44211	0.652209	0.736	0.0468151
N (neurons)	25	25	25	25	25	25	25	25	25	25	25	25
