# Supplementary material for: Local projections of layer Vb-to-Va are more prominent in lateral than in medial entorhinal cortex
Source: eLife. 2021 Mar 26;10:e67262. doi: 10.7554/eLife.67262 (PMC8051944; doi:10.7554/eLife.67262)
Supplement: Figure 3—source data 1. [file elife-67262-fig3-data1.xlsx]

## Sheet: Figure 1
Figure 3M	LEC
	Animal ID	Genotype	Virus	Injection site	Label intensity nomalized to LIII
					layer Va	layer II
	74790	MEC13-53D+/-	AAV-TRE-tight-oChIEF-Citrine	right EC	1.20851	0.559996
	79156	MEC13-53D+/-	AAV-TRE-tight-oChIEF-Citrine	right LEC	1.07221	0.635677
	80571	MEC13-53D+/-	AAV-TRE-tight-oChIEF-Citrine	right LEC	1.15857	0.55669
	83808	MEC13-53D+/-	AAV-TRE-tight-oChIEF-Citrine	right LEC	1.12017	0.618875
				Mean	1.13986	0.592809
	MEC
	Animal ID	Genotype	Virus	Injection site	Label intensity nomalized to LIII
					layer Va	layer II
	74790	MEC13-53D+/-	AAV-TRE-tight-oChIEF-Citrine	right EC	0.723074	0.691919
	79156	MEC13-53D+/-	AAV-TRE-tight-oChIEF-Citrine	left MEC	0.877496	0.447742
	83805	MEC13-53D+/-	AAV-TRE-tight-oChIEF-Citrine	right MEC	0.700716	0.62306
	86444	MEC13-53D+/-	AAV-TRE-tight-oChIEF-Citrine	left MEC	0.761045	0.6636
				Mean	0.765583	0.60658
