# Supplementary material for: Local projections of layer Vb-to-Va are more prominent in lateral than in medial entorhinal cortex
Source: eLife. 2021 Mar 26;10:e67262. doi: 10.7554/eLife.67262 (PMC8051944; doi:10.7554/eLife.67262)
Supplement: Figure 4—figure supplement 2—source data 1. [file elife-67262-fig4-figsupp2-data1.xlsx]

## Sheet: Figure 4—figure supplement 2
Figure 4—figure supplement 2
	DV level	Animal ID (slice No.)	Extent of preserved apical dendrites	Voltage response to light stimulation (mV)		Normalized EPSP of LVa neurons based on LIII response
				LVa	Average of LIII	D	M	V
	D	81760 (2)	Apical dendrites with tuft in LI	-	4.14	0
	D	81760 (2)	No apical dendrites reaching LIII	-	4.14	0
	M	81760 (3)	Severing in LII	-	4.35		0
	M	82296 (3)	Severing in LIII	-	1.925		0
	M	82296 (3)	No apical dendrites reaching LIII	-	1.925		0
	D	82270 (4)	Apical dendrites with tuft in LI	-	2.255	0
	M	83380 (1)	Severing in LIII	-	5.88		0
	V	83380 (2)	Apical dendrites with tuft in LI	-	3.68			0
	V	83380 (2)	Apical dendrites with tuft in LI	1.21	3.68			0.328804
	V	83380 (2)	Apical dendrites with tuft in LI	1.83	3.68			0.497283
	M	83381 (2)	Apical dendrites with tuft in LI	1.45	6.08		0.238487
	D	83835 (2)	Apical dendrites with tuft in LI	-	3.82	0
	D	83835 (2)	No apical dendrites reaching LIII	-	3.82	0
	M	84627 (2)	Apical dendrites with tuft in LI	-	7.37		0
	M	84627 (2)	Apical dendrites with tuft in LI	-	7.37		0
	V	85866 (2)	Apical dendrites with tuft in LI	2.83	6.78			0.417404
	V	85866 (2)	Apical dendrites with tuft in LI	6.05	6.78			0.89233
	M	85868 (1)	Apical dendrites with tuft in LI	-	5.255		0
Mean						0	0.0298109	0.427164
SEM						0	0.0278855	0.128613
N (neurons)						5	8	5
