# Supplementary material for: Local projections of layer Vb-to-Va are more prominent in lateral than in medial entorhinal cortex
Source: eLife. 2021 Mar 26;10:e67262. doi: 10.7554/eLife.67262 (PMC8051944; doi:10.7554/eLife.67262)
Supplement: Figure 4—source data 1. [file elife-67262-fig4-data1.xlsx]

## Sheet: Figure 4
Figure 4
Figure 4DE	Voltage response to light stimulation
	LIIs		LIIp		LIII		LVa
	Animal ID (slice No.)	mV	Animal ID (slice No.)	mV	Animal ID (slice No.)	mV	Animal ID (slice No.)	mV
	81759 (1)	-	81759 (2)	-	81759 (1)	3.3	81760 (2)	-
	81759 (1)	-	81760 (3)	2.79	81759 (2)	1.9	81760 (2)	-
	81759 (2)	0.75	81760 (3)	-	81760 (2)	4.14	81760 (3)	-
	81760 (2)	-	82770 (2)	-	81760 (3)	4.35	82296 (3)	-
	82297 (1)	-	83380 (1)	3.75	82297 (1)	7.11	82296 (3)	-
	82296 (3)	0.74	83835 (2)	0.71	82296 (3)	2.35	82770 (4)	-
	82770 (2)	-	84625 (4)	4.73	82296 (3)	1.5	83380 (1)	-
	82770 (4)	-	84625 (4)	-	82770 (2)	3.16	83380 (1)	-
	82987 (2)	-	84627 (2)	5.98	82770 (2)	1.86	83380 (1)	1.21
	83380 (1)	-	84627 (1)	1.47	82770 (4)	2.29	83380 (1)	1.83
	83380 (1)	-	85866 (1)	7.99	82770 (4)	2.22	83381 (2)	1.45
	83380 (2)	-	85866 (1)	4.27	82987 (2)	3.74	83835 (2)	-
	83380 (2)	-	85868 (1)	-	83380 (1)	7.28	83835 (2)	-
	83381 (2)	0.96	85868 (1)	-	83380 (1)	4.48	84627 (2)	-
	83835 (2)	0.24	85957 (1)	1.77	83380 (1)	4.82	84627 (2)	-
	84625 (4)	-	85957 (3)	3.26	83380 (1)	2.98	85866 (1)	2.83
	84627 (1)	-	85957 (3)	-	83380 (1)	3.24	85866 (1)	6.05
	85868 (1)	0.94	85957 (3)	1.68	83381 (2)	6.08	85868 (1)	-
	85957 (1)	-			83835 (2)	4.75
	85957 (3)	-			83835 (2)	2.89
					84625 (4)	7.31
					84625 (4)	6.25
					84627 (2)	7.37
					84627 (1)	3.19
					84627 (1)	4.08
					85866 (1)	6.78
					85868 (1)	4.69
					85868 (1)	5.82
					85957 (1)	2.31
					85957 (3)	4.99
Mean		0.726		3.49091		4.241		2.674
SEM		0.116193		0.624896		0.326906		0.794368
N (neurons)		5		11		30		5
Figure 4F	Normalized EPSP based on LIII response
	LIIs	LIIp	LIII	LVa
	0.394737	0.641379	1	0.328804
	0.384416	0.637755	1	0.497283
	0.157895	0.185864	1	0.238487
	0.0628272	0.69764	1	0.417404
	0.178877	0.811398	1	0.89233
		0.404402	1.22078
		1.17847	0.779221
		0.629794	1.25896
		0.766234	0.741036
		0.653307	1.01552
		0.336673	0.984479
			1
			1.2381
			0.761905
			1.30978
			0.809783
			0.880435
			1
			1.24346
			0.756545
			1.07817
			0.921829
			1
			0.877579
			1.12242
			1
			0.892483
			1.10752
			1
			1
Mean	0.23575	0.631174	1	0.474862
SEM	0.0588478	0.0756113	0.0274018	0.101052
N (neurons)	5	11	30	5
Figure 4G	Input resistance
	LIIs		LIIp		LIII		LVa
	Animal ID (slice No.)	MΩ	Animal ID (slice No.)	MΩ	Animal ID (slice No.)	MΩ	Animal ID (slice No.)	MΩ
	81759 (1)	-	81759 (2)	-	81759 (1)	3.12	81760 (2)	-
	81759 (1)	-	81760 (3)	4.44	81759 (2)	2.76	81760 (2)	-
	81759 (2)	5.76	81760 (3)	-	81760 (2)	1.74	81760 (3)	-
	81760 (2)	-	82770 (2)	-	81760 (3)	1.44	82296 (3)	-
	82297 (1)	-	83380 (1)	3.4	82297 (1)	3.6	82296 (3)	-
	82296 (3)	4.4	83835 (2)	2.8	82296 (3)	2.5	82770 (4)	-
	82770 (2)	-	84625 (4)	2.6	82296 (3)	4.3	83380 (1)	-
	82770 (4)	-	84625 (4)	-	82770 (2)	1.6	83380 (1)	-
	82987 (2)	-	84627 (2)	3.5	82770 (2)	1.7	83380 (1)	4.9
	83380 (1)	-	84627 (1)	2.3	82770 (4)	2.5	83380 (1)	8
	83380 (1)	-	85866 (1)	2.8	82770 (4)	2.9	83381 (2)	5.1
	83380 (2)	-	85866 (1)	3.2	82987 (2)	4.9	83835 (2)	-
	83380 (2)	-	85868 (1)	-	83380 (1)	2.5	83835 (2)	-
	83381 (2)	3.6	85868 (1)	-	83380 (1)	3.1	84627 (2)	-
	83835 (2)	6.1	85957 (1)	2.3	83380 (1)	3.1	84627 (2)	-
	84625 (4)	-	85957 (3)	3.2	83380 (1)	3.9	85866 (1)	3.6
	84627 (1)	-	85957 (3)	-	83380 (1)	3.9	85866 (1)	6.3
	85868 (1)	1.7	85957 (3)	4.1	83381 (2)	3.2	85868 (1)	-
	85957 (1)	-			83835 (2)	3.8
	85957 (3)	-			83835 (2)	3.7
					84625 (4)	2.2
					84625 (4)	2.9
					84627 (2)	3.1
					84627 (1)	3.2
					84627 (1)	2.8
					85866 (1)	3.2
					85868 (1)	2.5
					85868 (1)	2.3
					85957 (1)	2.3
					85957 (3)	3.2
Mean		4.312		3.14909		2.932		5.58
SEM		0.710799		0.198113		0.149554		0.662963
N (neurons)		5		11		29		5
Figure 4H	Latency
	LIIs		LIIp		LIII		LVa
	Animal ID (slice No.)	mV	Animal ID (slice No.)	mV	Animal ID (slice No.)	mV	Animal ID (slice No.)	mV
	81759 (1)	105.012	81759 (2)	271.248	81759 (1)	246.012	81760 (2)	527.142
	81759 (1)	101.305	81760 (3)	326.5	81759 (2)	167.72	81760 (2)	335.45
	81759 (2)	106.948	81760 (3)	392.725	81760 (2)	309.88	81760 (3)	258.85
	81760 (2)	103.729	82770 (2)	261.595	81760 (3)	298.325	82296 (3)	390.018
	82297 (1)	189.55	83380 (1)	131.773	82297 (1)	327.745	82296 (3)	613.102
	82296 (3)	95.7305	83835 (2)	274.684	82296 (3)	291.728	82770 (4)	230.874
	82770 (2)	78.9395	84625 (4)	205.726	82296 (3)	517.155	83380 (1)	215.819
	82770 (4)	80.7655	84625 (4)	130.832	82770 (2)	251.053	83380 (1)	482.84
	82987 (2)	67.0575	84627 (2)	312.902	82770 (2)	181.287	83380 (1)	426.398
	83380 (1)	89.275	84627 (1)	227.64	82770 (4)	242.353	83380 (1)	348.842
	83380 (1)	98.6977	85866 (1)	248.65	82770 (4)	205.143	83381 (2)	179.066
	83380 (2)	103.373	85866 (1)	144.111	82987 (2)	224.506	83835 (2)	297.072
	83380 (2)	96.8217	85868 (1)	124.408	83380 (1)	221.625	83835 (2)	450.138
	83381 (2)	97.5088	85868 (1)	307.905	83380 (1)	218.034	84627 (2)	210.163
	83835 (2)	149.084	85957 (1)	207.714	83380 (1)	484.712	84627 (2)	306.113
	84625 (4)	97.707	85957 (3)	351.795	83380 (1)	210.18	85866 (1)	409.108
	84627 (1)	88.1377	85957 (3)	500.368	83380 (1)	254.07	85866 (1)	261.442
	85868 (1)	107.038	85957 (3)	598.805	83381 (2)	240.124	85868 (1)	185.757
	85957 (1)	64.2108			83835 (2)	297.907
	85957 (3)	102.955			83835 (2)	279.577
					84625 (4)	331.793
					84625 (4)	280.322
					84627 (2)	196.322
					84627 (1)	240.381
					84627 (1)	187.155
					85866 (1)	278.31
					85868 (1)	145.767
					85868 (1)	439.22
					85957 (1)	250.427
					85957 (3)	285.99
Mean		101.192		278.854		270.161		340.455
SEM		5.9236		29.0735		15.355		28.6854
N (neurons)		20		18		30		18
