# Supplementary material for: Local projections of layer Vb-to-Va are more prominent in lateral than in medial entorhinal cortex
Source: eLife. 2021 Mar 26;10:e67262. doi: 10.7554/eLife.67262 (PMC8051944; doi:10.7554/eLife.67262)
Supplement: Figure 5—source data 1. [file elife-67262-fig5-data1.xlsx]

## Sheet: Figure 5
Figure 5
Figure 5DE	Voltage response to light stimulation
	LIIa		LIIb		LIII		LVa
	Animal ID (slice No.)	mV	Animal ID (slice No.)	mV	Animal ID (slice No.)	mV	Animal ID (slice No.)	mV
	82722 (1)	1.12	82722 (1)	4.81	82722 (1)	9.41	82722 (2)	3.7
	82722 (2)	-	82727 (1)	4.16	82722 (2)	2.05	82727 (1)	9.49
	82722 (2)	-	82727 (1)	11.84	82722 (2)	5.67	82990 (1)	5.71
	82722 (3)	-	82727 (2)	7.98	82722 (3)	16.1	83384 (1)	5.17
	82727 (1)	-	82990 (1)	1.61	82727 (1)	18.73	83384 (1)	3.55
	82727 (1)	2.05	83384 (1)	2.28	82727 (2)	11.82	83384 (2)	4.73
	82990 (1)	-	83377 (2)	8.36	82727 (2)	14.39	83384 (2)	10.84
	82990 (1)	-	83377 (3)	3.68	82727 (3)	4.06	83384 (2)	10.15
	83384 (1)	-	83377 (3)	-	82727 (3)	3.37	83384 (2)	8.14
	83384 (1)	-	83389 (1)	8.43	82990 (1)	4.89	83389 (1)	-
	83384 (2)	-	83389 (2)	10.32	82990 (1)	3.6	83389 (2)	21.75
	83384 (2)	-	83389 (2)	11.85	83384 (1)	10.22	83386 (1)	4.2
	83377 (2)	2.29	83386 (1)	2.92	83384 (2)	6.61	83386 (2)	9.27
	83377 (3)	-	83386 (2)	3.18	83384 (2)	6.85	83386 (2)	13.22
	83377 (3)	-	83386 (2)	3.18	83377 (2)	4.86	85178 (1)	11.05
	83389 (1)	-	85212 (1)	7.63	83377 (2)	5.08	85178 (3)	2.42
	83389 (1)	1.12	85212 (1)	12.06	83377 (2)	15.86	85178 (3)	9.05
	83389 (2)	-	85178 (1)	19.52	83377 (3)	9	85178 (3)	13.39
	83389 (2)	-	85178 (1)	5.68	83377 (3)	6.16	85178 (4)	2.39
	83389 (2)	0.94	85178 (3)	4.96	83377 (3)	8.06
	83386 (1)	-	85178 (3)	-	83389 (1)	7.06
	83386 (1)	-	85178 (4)	3.37	83389 (1)	7.82
	83386 (2)	4.13	85178 (4)	-	83389 (2)	18.41
	83386 (2)	1.43	85178 (4)	-	83389 (2)	20.98
	85178 (3)	-	85959 (4)	-	83389 (2)	18.61
	85178 (4)	-	85959 (4)	-	83386 (1)	5.76
					83386 (2)	16.83
					83386 (2)	13.38
					85212 (1)	3.9
					85178 (1)	13.59
					85178 (3)	6.39
					85178 (3)	9.43
					85178 (4)	3.56
					85959 (4)	1.84
Mean		1.86857		6.891		9.24559		8.23444
SEM		0.391227		0.981664		0.92896		1.12575
N (neurons)		7		20		34		18
Figure 5F	Normalized EPSP based on LIII response
	LIIa	LIIb	LIII	LVa
	0.119022	0.511158	1	0.958549
	0.10945	0.222104	0.531088	0.506674
	0.266279	0.632141	1.46891	1.34511
	0.150538	0.608928	1	0.505871
	0.0486207	0.37927	1	0.347358
	0.273419	0.223092	0.901946	0.702823
	0.0946706	0.972093	1.09805	1.6107
		0.475452	1.09287	1.50817
		1.13306	0.907133	1.20951
		0.533793	1.15194	1.125
		0.612931	0.848057	0.729167
		0.506944	1	0.613704
		0.210526	0.982169	0.875207
		0.210526	1.01783	0.813098
		1.95641	0.565116	0.305942
		3.09231	0.590698	1.14412
		1.43635	1.84419	1.69279
		0.417954	1.16279	0.671348
		0.627054	0.795866
		0.946629	1.04134
			0.948925
			1.05108
			0.952241
			1.08517
			0.962586
			1
			1.1142
			0.885799
			1
			1
			0.807838
			1.19216
			1
			1
Mean	0.151714	0.785436	1	0.925842
SEM	0.0301953	0.152599	0.0392216	0.097466
N (neurons)	7	20	34	18
Figure 5G	Input resistance
	LIIa		LIIb		LIII		LVa
	Animal ID (slice No.)	mV	Animal ID (slice No.)	mV	Animal ID (slice No.)	mV	Animal ID (slice No.)	mV
	82722 (1)	305.52	82722 (1)	249.227	82722 (1)	299.435	82722 (2)	425.4
	82722 (2)	344.087	82727 (1)	178.865	82722 (2)	245.766	82727 (1)	280.992
	82722 (2)	385.827	82727 (1)	221.236	82722 (2)	204.278	82990 (1)	244.556
	82722 (3)	577.585	82727 (2)	214.92	82722 (3)	278.368	83384 (1)	274.648
	82727 (1)	164.252	82990 (1)	206.067	82727 (1)	296.708	83384 (1)	238.75
	82727 (1)	367.733	83384 (1)	62.7272	82727 (2)	154.897	83384 (2)	326.215
	82990 (1)	349.958	83377 (2)	300.99	82727 (2)	120.254	83384 (2)	123.293
	82990 (1)	271.725	83377 (3)	310.752	82727 (3)	267.815	83384 (2)	125.051
	83384 (1)	217.373	83377 (3)	297.315	82727 (3)	213.76	83384 (2)	381.21
	83384 (1)	292.995	83389 (1)	175.914	82990 (1)	110.715	83389 (1)	465.67
	83384 (2)	340.977	83389 (2)	370.342	82990 (1)	149.895	83389 (2)	208.898
	83384 (2)	195.323	83389 (2)	279.781	83384 (1)	143.83	83386 (1)	169.822
	83377 (2)	225.861	83386 (1)	164.344	83384 (2)	157.027	83386 (2)	193.948
	83377 (3)	306.04	83386 (2)	176.008	83384 (2)	261.863	83386 (2)	222.175
	83377 (3)	275.363	83386 (2)	103.182	83377 (2)	444.145	85178 (1)	219.519
	83389 (1)	335.668	85212 (1)	179.419	83377 (2)	300.79	85178 (3)	369.506
	83389 (1)	307.453	85212 (1)	197.26	83377 (2)	233.285	85178 (3)	218.262
	83389 (2)	309.009	85178 (1)	158.282	83377 (3)	193.818	85178 (3)	166.79
	83389 (2)	328.435	85178 (1)	237.496	83377 (3)	207.698	85178 (4)	364.459
	83389 (2)	278.662	85178 (3)	281.194	83377 (3)	119.781
	83386 (1)	312.534	85178 (3)	79.0879	83389 (1)	146.748
	83386 (1)	442.615	85178 (4)	320.868	83389 (1)	283.968
	83386 (2)	341.484	85178 (4)	386.853	83389 (2)	109.76
	83386 (2)	316.664	85178 (4)	371.701	83389 (2)	145.641
	85178 (3)	384.145	85959 (4)	259.896	83389 (2)	123.261
	85178 (4)	437.035	85959 (4)	106.092	83386 (1)	92.6929
					83386 (2)	225.56
					83386 (2)	202.472
					85212 (1)	228.527
					85178 (1)	116.124
					85178 (3)	154.215
					85178 (3)	112.956
					85178 (4)	118.655
					85959 (4)	140.896
Mean		323.628		226.532		194.282		264.167
SEM		16.0836		17.1764		13.2504		22.2152
N (neurons)		26		26		34		19
Figure 5G	Input resistance
	LIIa		LIIb		LIII		LVa
	Animal ID (slice No.)	MΩ	Animal ID (slice No.)	MΩ	Animal ID (slice No.)	MΩ	Animal ID (slice No.)	MΩ
	82722 (1)	4.8	82722 (1)	4.4	82722 (1)	4.4	82722 (2)	4
	82722 (2)	-	82727 (1)	5.8	82722 (2)	4	82727 (1)	3.8
	82722 (2)	-	82727 (1)	3.7	82722 (2)	4.7	82990 (1)	3.8
	82722 (3)	-	82727 (2)	4.9	82722 (3)	4.3	83384 (1)	4.6
	82727 (1)	-	82990 (1)	5.8	82727 (1)	3.8	83384 (1)	4.5
	82727 (1)	3.1	83384 (1)	6.7	82727 (2)	3.8	83384 (2)	5.3
	82990 (1)	-	83377 (2)	4.5	82727 (2)	4	83384 (2)	3.9
	82990 (1)	-	83377 (3)	4.5	82727 (3)	4.1	83384 (2)	4.1
	83384 (1)	-	83377 (3)	-	82727 (3)	8.1	83384 (2)	3.7
	83384 (1)	-	83389 (1)	4.9	82990 (1)	4.4	83389 (1)	-
	83384 (2)	-	83389 (2)	4.7	82990 (1)	2.2	83389 (2)	4.2
	83384 (2)	-	83389 (2)	4.3	83384 (1)	3.3	83386 (1)	4.1
	83377 (2)	4.1	83386 (1)	4	83384 (2)	4.8	83386 (2)	3.2
	83377 (3)	-	83386 (2)	5.4	83384 (2)	4.7	83386 (2)	3.6
	83377 (3)	-	83386 (2)	5.4	83377 (2)	4.3	85178 (1)	4.9
	83389 (1)	-	85212 (1)	4.7	83377 (2)	3.8	85178 (3)	5.4
	83389 (1)	4.9	85212 (1)	3.9	83377 (2)	3.3	85178 (3)	4.8
	83389 (2)	-	85178 (1)	3.3	83377 (3)	3.8	85178 (3)	4
	83389 (2)	-	85178 (1)	4	83377 (3)	4	85178 (4)	3.7
	83389 (2)	6.6	85178 (3)	4.9	83377 (3)	3.9
	83386 (1)	-	85178 (3)	-	83389 (1)	5.1
	83386 (1)	-	85178 (4)	9.6	83389 (1)	4.4
	83386 (2)	4.5	85178 (4)	-	83389 (2)	3.6
	83386 (2)	5.6	85178 (4)	-	83389 (2)	4
	85178 (3)	-	85959 (4)	-	83389 (2)	4
	85178 (4)	-	85959 (4)	-	83386 (1)	4
					83386 (2)	3.8
					83386 (2)	3.8
					85212 (1)	4.2
					85178 (1)	4.2
					85178 (3)	4.2
					85178 (3)	4.3
					85178 (4)	5.4
					85959 (4)	4.9
Mean		4.8		4.97		4.22353		4.2
SEM		0.387562		0.295728		0.15377		0.137437
N (neurons)		7		20		33		18
